# Supplementary material for: Zebrafish Mutant Lines Reveal the Interplay between nr3c1 and nr3c2 in the GC-Dependent Regulation of Gene Transcription
Source: MDPI journal article supplement (doi:10.3390/ijms23052678), 2022-02-28
Supplement: s1 [file s1]

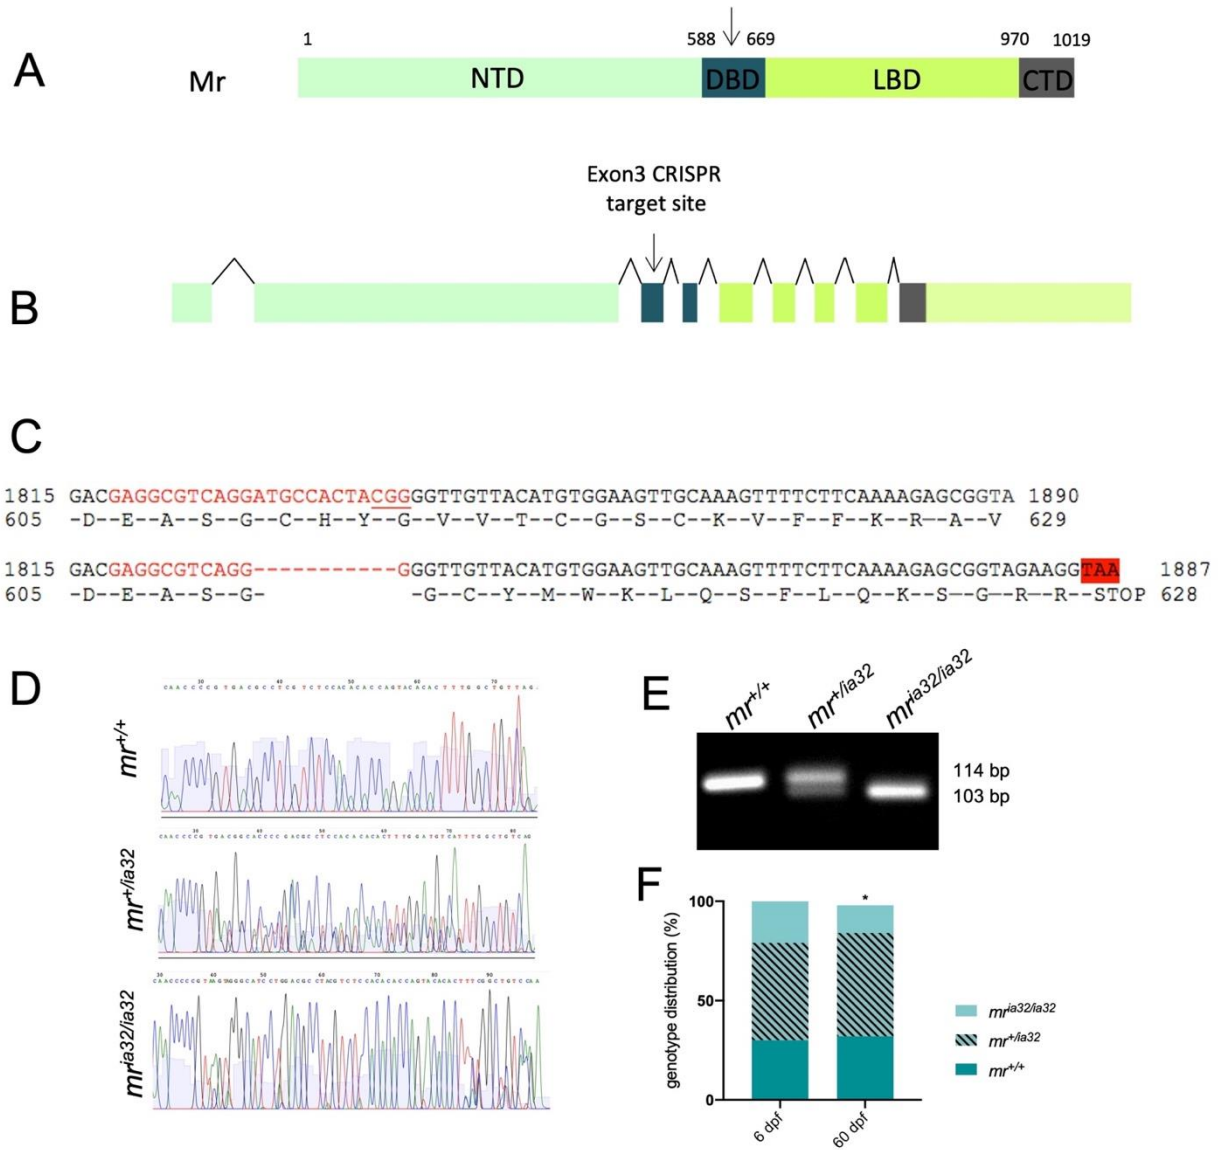

**Figure S1.** Generation of *mr* mutant line. (A) Schematic representation of zebrafish Mr protein composed of N-terminal domain (NTD), DBD, LBD and C-terminal domain (CTD). (B) Schematic representation of *nr3c2* exons. The arrow (both in A e B panel) indicates the region where the mutation occurred. (C) Partial alignment of WT and mutant *nr3c2* nucleotide and aminoacidic sequences. The premature stop codon (TAA) is highlighted in red. (D) chromatogram of *mr<sup>+/+</sup>*, *mr<sup>+/ia32</sup>* and *mr<sup>ia32/ia32</sup>* DNA samples sequenced using the *nr3c2* reverse primer listed in Table 1. (E) Genotyping of *nr3c2* mutants with 3% agarose gel. (F) Survival rate of *mr<sup>+/+</sup>*, *mr<sup>+/ia32</sup>* and *mr<sup>ia32/ia32</sup>* animals at 6 dpf (n=80 animals from 3 different breedings between *mr<sup>+/ia32</sup>* adults) and ad 60 dpf (n=80 animals from 3 different breedings between *mr<sup>+/ia32</sup>* adults). Statistical analyses were performed with  $\chi^2$  test. \*p<0.05.

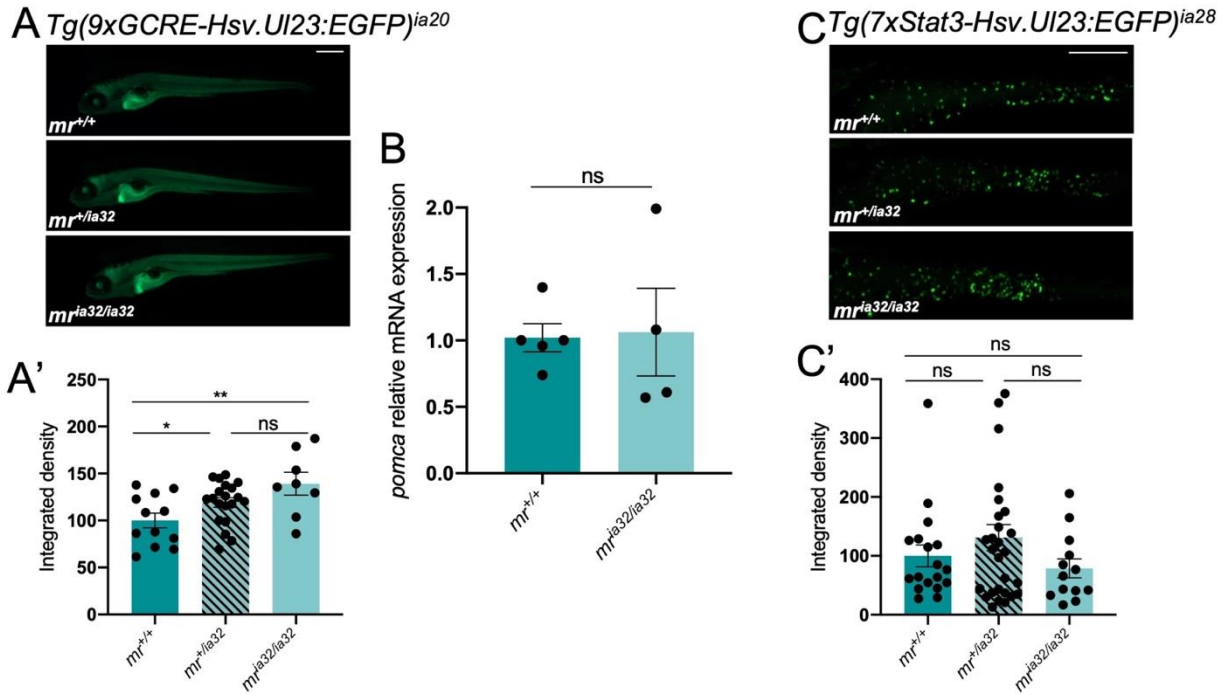

**Figure S2.** GC/Gr- and Stat3-dependent fluorescence in *mr* mutants. (A) Representative pictures (A) and fluorescence quantification (A') of *mr*<sup>+/+</sup>, *mr*<sup>+/ia32</sup> and *mr*<sup>ia32/ia32</sup> 6-dpf larvae in *Tg(9xGCRE-Hsv.UI23:EGFP)<sup>ia20</sup>* transgenic background. Scalebar=500μm.(B) RT-qPCR of *pomca* mRNA in *mr*<sup>+/+</sup> and *mr*<sup>ia32/ia32</sup> 6-dpf larvae. (C) Representative pictures (C) and fluorescence quantification (C') of *mr*<sup>+/+</sup>, *mr*<sup>+/ia32</sup> and *mr*<sup>ia32/ia32</sup> 6-dpf larvae in *Tg(7xStat3-Hsv.UI23:EGFP)<sup>ia28</sup>* transgenic background in the intestine. Scalebar=100μm. Statistical analyses were performed with Student *t* test. Mean ± SEM. \**p*<0.05; \*\**p*<0.001; ns = not significant.

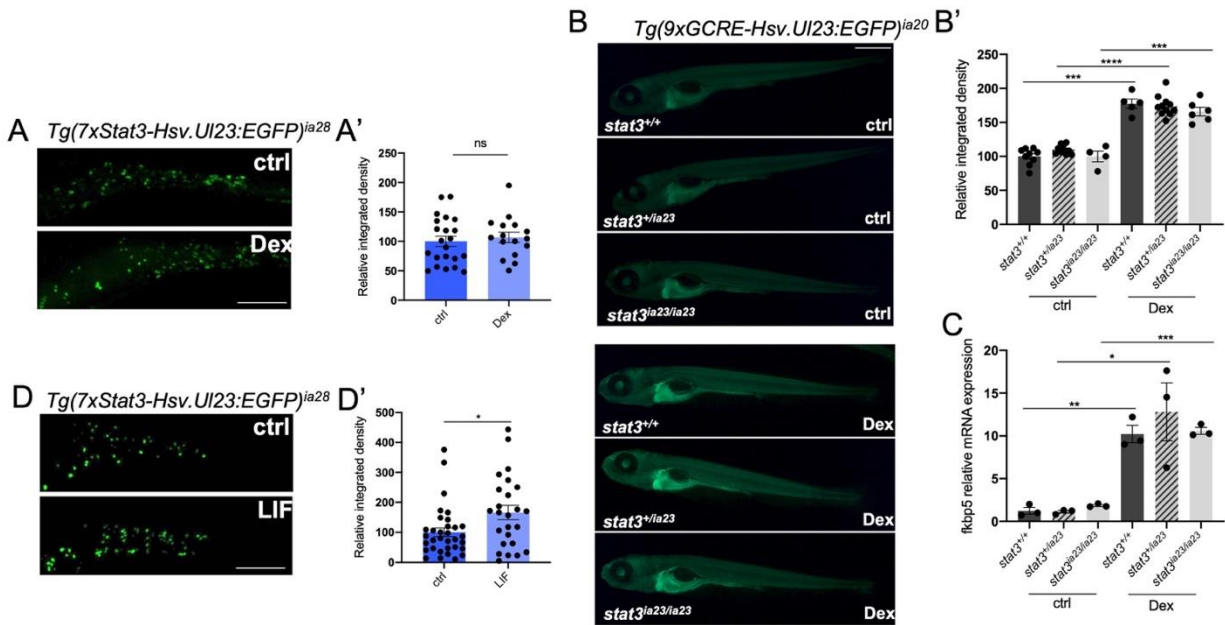

**Figure S3.** Gr-Stat3 crosstalk with transgenic lines. (A) Representative pictures (A) and fluorescence quantification (A') of *Tg(7xStat3-Hsv.UI23:EGFP)<sup>ia28</sup>* transgenic larvae intestine treated with Dex for 24hours. Scalebar=100μm.(B) Representative pictures (B) and fluorescence quantification (B') of *stat3*<sup>+/+</sup>, *stat3*<sup>+/ia23</sup> and *stat3*<sup>ia23/ia23</sup> in *Tg(9xGCRE-Hsv.UI23:EGFP)<sup>ia20</sup>* transgenic background treated with Dex for 24hours. Scalebar=500μm.(C) RT-qPCR analysis of

*fkbp5* mRNA in 6-dpf *stat3*<sup>+/+</sup>, *stat3*<sup>+/ia23</sup> and *stat3*<sup>ia23/ia23</sup> treated with Dex for 24 hours. **(D)** Representative pictures **(D)** and fluorescence quantification **(D')** of *Tg(7xStat3-Hsv.Ul23:EGFP)*<sup>ia28</sup> transgenic larvae intestine treated with 20  $\mu$ M LIF for 3 days. Scale bar = 100  $\mu$ m. Statistical analyses were performed with Student *t* test. Mean  $\pm$  SEM. \**p*<0.05; \*\**p*<0.01; \*\*\**p*<0.001.
